1 **Dynamics of deep water and N uptake under varied N and water supply**

2

3 Guanying Chen<sup>\*1</sup>, Camilla Ruø Rasmussen<sup>2</sup>, Dorte Bodin Dresbøll<sup>1</sup>, Abraham George Smith<sup>3</sup>, and Kristian  
4 Thorup-Kristensen<sup>1</sup>

5

6 <sup>1</sup>Department of Plant and Environmental Sciences, University of Copenhagen, Denmark;

7 <sup>2</sup>Earth and Life Institute, Environmental Sciences, Louvain-la-Neuve, Belgium;

8 <sup>3</sup>Department of Computer Science, University of Copenhagen, Denmark

9

10 **\*Corresponding Author**

11 Guanying Chen ([guanyingchen@plen.ku.dk](mailto:guanyingchen@plen.ku.dk))

12

13 **16-digit ORCID of the authors**

14 Guanying Chen: 0000-0003-3308-2252

15 Camilla Ruø Rasmussen: 0000-0002-5577-4789

16 Dorte Bodin Dresbøll: 0000-0001-6374-7257

17 Abraham George Smith: 0000-0001-9782-2825

18 Kristian Thorup-Kristensen: 0000-0001-5476-985X

19 **Acknowledgements**

20 We thank technician Aymeric d'Herouville for his contribution to the experimental work. We  
21 acknowledge the Villum Foundation (DeepFrontier project, grant number VKR023338) for financial  
22 support for this study, and China Scholarship Council for the financial support of Guanying Chen for  
23 her PhD research.

24

25

26 **Abstract**

27 **Aims**

28 Enhanced nitrogen (N) and water uptake from deep soil layers may increase resource use efficiency  
29 whilst maintaining yield under stressed conditions. Winter oilseed rape (*Brassica napus* L.) can  
30 develop deep roots and access deep-stored resources such as N and water, while this potential has  
31 large uncertainties in variable environments. In this study, we aimed to evaluate the effects of reduced  
32 N and water supply on deep N and water uptake.

33 **Methods**

34 Oilseed rape plants grown in outdoor rhizotrons were supplied with 240 and 80 kg N ha<sup>-1</sup> respectively  
35 in 2019 whereas a well-watered and a water-deficit treatment were established in 2020. To track deep  
36 water and N uptake, a mixture of <sup>2</sup>H<sub>2</sub>O and Ca(<sup>15</sup>NO<sub>3</sub>)<sub>2</sub> was injected into the soil column at 0.5 and  
37 1.7 m depths. δ<sup>2</sup>H in transpiration water and δ<sup>15</sup>N in leaves were measured after injection. δ<sup>15</sup>N in  
38 biomass samples were also measured.

39 **Results**

40 Differences in N or water supply had little effect on root growth. The low N treatment reduced water  
41 uptake throughout the soil profile, but caused a non-significant increment in <sup>15</sup>N uptake efficiency at  
42 both 0.5 and 1.7 m. Water deficit in the upper soil layers led to compensatory deep water, while N  
43 uptake was not altered by soil water status.

44 **Conclusion**

45 Our findings demonstrate that for winter oilseed rape, high N application and water deficiency in  
46 shallow layers increases deep water uptake, and that the efficiency of deep N uptake is mainly  
47 sensitive to N supply rather than water supply.

48 **Keywords** *Brassica napus*, deep root, nitrogen use efficiency, water uptake, dual-labelling

49

50

51

52

53

54 **Declarations**

55 Funding

56 This study was supported by Villum Foundation (DeepFrontier project, grant number VKR023338).

57 China Scholarship Council provided financial support of Guanying Chen for her PhD research.

58 Conflicts of interest

59 No potential conflict of interest was reported by the authors.

60 Availability of data and material

61 The data supporting the findings of this study are available from the corresponding author, Guanying  
62 Chen, upon request.

63 Code availability

64 Not applicable

65 Authors' contributions

66 Kristian Thorup-Kristensen, Dorte Bodin Dresbøll and Guanying Chen initiated the research,  
67 designed the experiment. Guanying Chen carried out the experiment and wrote the manuscript with  
68 support from Kristian Thorup-Kristensen and Dorte Bodin Dresbøll. Camilla Ruø Rasmussen helped  
69 with data analysis and participated in manuscript revision. Abraham George Smith provided the  
70 technical assistance in processing root images with software and offered language editing.

## 71 **Introduction**

72 Nitrogen (N) and water are the main factors that can be modified in agricultural production and have  
73 been widely documented for their crucial roles in determining yield (Mueller et al. 2012; Sinclair and  
74 Rufty 2012). Inadequate supply of N and water leads to yield loss, while the loss of N from  
75 agricultural land also causes environmental problems. Therefore, improving water and N use is  
76 crucial for sustainable agricultural production.

77 Deep-rooted crops have shown great potential in enhancing soil N and water uptake, as well as  
78 improving yield (Wasson et al. 2012; Thorup-Kristensen et al. 2020a), while deep root development  
79 and function is highly sensitive to the external environment (Lynch and Wojciechowski 2015).  
80 Management and environmental factors such as N and water supply affect plant growth, soil N and  
81 water availability, and subsequently affect root uptake. N supply affects overall plant growth and  
82 yield (Asare and Scarisbrick 1995; Khan et al. 2017), but the current findings of the effects of N  
83 supply on root growth and N uptake seem ambiguous. Increasing N supply stimulates root growth  
84 either via more robust shoot growth or as a consequence of increased soil N availability (Hodge et al.  
85 1999). In contrast, Svoboda and Haberle (2006) found that the rooting depth and deep root density of  
86 winter wheat (*Triticum aestivum* L.) could be reduced when increasing N fertilization. Although plant  
87 root surface area and total N uptake may be enhanced by a higher fertilization rate (Lynch et al. 2012),  
88 it has been reported that nitrogen uptake efficiency in oilseed rape (*Brassica napus* L.) and winter  
89 wheat can decline with increasing N fertilizer rate (Rathke et al. 2006; Rasmussen et al. 2015). Riar  
90 et al. (2020) found that, independent of irrigation, oilseed rape plants fertilized with 100 kg N ha<sup>-1</sup>  
91 had higher N uptake efficiency than those fertilized with 200 kg N ha<sup>-1</sup>.

92 Nitrogen supply is important for improving water use. Increased N application may result in higher  
93 water use efficiency of wheat and oilseed rape (Taylor et al. 1991; Waraich et al. 2011), possibly due  
94 to improved shoot growth. Compared with no or less fertilization, adequately fertilized crops usually  
95 grow more vigorously and have larger leaf areas, increasing transpiration and decreasing soil  
96 evaporation. Increasing N supply increases transpiration intensity under normal water supply, thus  
97 enhancing water use (Li et al. 2009).

98 Water availability controls crop growth, especially canopy development, but it also controls root  
99 growth. Bloom et al. (1985) hypothesized that plant root growth may be stimulated under drought to  
100 enhance or maintain the capacity for acquiring water. Accordingly, Vandoorne et al. (2012) found  
101 that although chicory's total root length decreased under water deficit conditions, the overall root

102 profiles developed deeper and triggered compensation from wetter and deeper horizons. Furthermore,  
103 both Li et al. (2011) and Álvarez et al. (2011) observed a significant increase in water use efficiency  
104 during water deficit.

105 In addition to altering the root growth and water acquisition, water status affects plant N uptake in  
106 various ways. Under the same fertilization rate, Riar et al. (2020) showed that irrigation management  
107 enhanced soil moisture and further improved oilseed rape's N uptake efficiency and N use efficiency  
108 by 40%. Water deficit also affects nitrogen demand, nitrogen availability and nitrogen assimilation  
109 and partitioning of the assimilates (Sadras et al. 2016). The reduced shoot growth driven by water  
110 deficit reduces plant nitrogen demand and tends to decrease nitrogen use efficiency if N input are not  
111 reduced correspondingly (Quemada and Gabriel 2016). The availability and supply of soil N can be  
112 limited by soil dryness due to reduced soil organic N mineralization (Jensen et al. 1997) and restricted  
113 nitrate movement by both mass flow and diffusion (Plett et al. 2020). Water deficit could also  
114 diminish nitrate reductase activity, hence reducing plant N assimilation (Gonzalez-Dugo et al. 2010).  
115 Moreover, assimilates tend to translocate to the roots rather than the shoots in the case of water  
116 deficiency (Li et al. 2011). In summary, both N and water supply can affect root growth, water, and  
117 N use.

118 Deep roots are not assumed to be as efficient as shallow roots in N and water uptake, as the roots  
119 reach the subsoil layers late in the growing period and are not able to develop as high densities there  
120 as in the topsoil. Existing studies indicate that water deficiency in topsoil can increase deep water  
121 uptake (Kirkegaard et al. 2007) and that decreased N supply in topsoil increased deep nitrogen uptake  
122 (Kuhlmann et al. 1989; Haberle et al. 2006). However, it is less clear to what extent deep root growth,  
123 as well as deep uptake of N and water, are affected by the total N and water availability for a crop.  
124 Studies of deep root growth, water, and N use under different N and water regimes could increase our  
125 understanding of the functions of deep roots. In addition, such studies would increase the  
126 understanding of the contribution of deep roots to crop N and water supply and to reduce N leaching  
127 losses, and how this is affected by crop management.

128 Oilseed rape is known for its high capacity for N and water uptake and has the potential to develop  
129 roots in soil layers below 2 m (Dresbøll et al. 2016; Kirkegaard et al. 2021). In this study, we used  
130 oilseed rape as the model crop and examined how N and water supply affect the root growth,  
131 utilization of N and water from deep soil layers, and N and water uptake dynamics in the subsoil. It  
132 was hypothesized that (I) N and water deficiency in topsoil stimulate root growth in deeper soil layers;

133 (II) Lower N availability in the upper soil layer reduces total water uptake, but enhances N uptake  
134 from the subsoil. (III) Lower water availability in the upper soil layer reduces the N uptake from the  
135 whole soil profile, but increases water uptake from the subsoil.

## 136 **Materials and methods**

### 137 *Experimental facility*

138 Two consecutive experiments were conducted in the seasons 2018/2019 and 2019/2020 using the  
139 rhizobox facility (Thorup-Kristensen et al. 2020b) at the University of Copenhagen in Taastrup,  
140 Zealand, Denmark (55°40' N; 12°18' E). The facility consists of rhizoboxes that allow observations  
141 of root growth and root activity down to 4 m depth. The growth medium was field soil. Both years  
142 the topsoil was replaced right before planting (Table 1). The rhizoboxes are rectangular columns of  
143 1.2 × 0.6 m, divided into an east- and a west-facing chamber, each with a surface area of 1.2 × 0.3 m.  
144 The front of the chambers is divided into 20 panels by metal frames covered by removable white  
145 foamed PVC boards, allowing root observations through transparent acrylic boards. The acrylic  
146 boards can be removed for sampling and measurements that require direct soil contact. For further  
147 details on the facility, see Rasmussen et al. (2020) and Thorup-Kristensen et al. (2020b).

### 148 *Experimental design*

149 Oilseed rape (*Brassica napus* L., cv. “Butterfly”) plants were sown in the field on August 16, 2018  
150 (Exp. 1) and in pots on August 13, 2019 (Exp. 2) before being transplanted to the rhizoboxes on  
151 October 8, 2018 and August 26, 2019, respectively. Due to a pest infestation (*Delia radicum*) in  
152 September 2019, a few plants were replaced by spare ones on September 24, 2019. The re-  
153 transplanted plants were smaller than the original ones during the entire growing period. Plant density  
154 in both years was five plants per chamber, corresponding to 14 plants m<sup>-2</sup>.

155 In Exp. 1, two N treatments were established by fertilizing with a nutrient solution, applying nutrients  
156 in a high N treatment (N240) equivalent 240 kg N ha<sup>-1</sup>, 38 kg P ha<sup>-1</sup>, 192 kg K ha<sup>-1</sup> ; and a low N  
157 treatment (N80) equivalent to 80 kg N ha<sup>-1</sup>, 13 kg P ha<sup>-1</sup>, 65 kg K ha<sup>-1</sup> respectively on March 27,  
158 2019. During this season, all chambers received water through precipitation and irrigation, which  
159 were sufficient to keep them well watered. In Exp. 2, two irrigation regimes were established. Rainout  
160 shelters were mounted on top of all chambers on February 26, 2020, to allow complete control of soil  
161 moisture by irrigation. Well-watered (WW) chambers were irrigated with 60 mm water on April 14

162 and again on April 15, 2020 to establish soil profiles with high initial water content. No more  
163 irrigation was given to the well-watered chambers until May 10, 2020. In the following month, the  
164 well-watered chambers were irrigated frequently to keep an adequate water supply. Water deficit  
165 (WD) chambers received no irrigation during the whole experimental period. In Exp. 2, all chambers  
166 were fertilized with a total of 200 kg N ha<sup>-1</sup>, 38 kg P ha<sup>-1</sup>, 192 kg K ha<sup>-1</sup>. Fertilization was divided  
167 into three applications, with N supply of 40, 80, and 80 kg N ha<sup>-1</sup> on September 5, 2019, March 2,  
168 and April 1, 2020. The treatments and timeline of the experiments are shown in Table 2. The two  
169 treatments in Exp. 1 and 2 were established in six randomly distributed replicates.

#### 170 *<sup>2</sup>H and <sup>15</sup>N labelling*

171 In both experiments, water and N uptake were traced using isotope labelled water and N injected into  
172 the soil at either 0.5 or 1.7 m depths. Tracer application was repeated in three chambers for each depth  
173 and treatment. Tracers were injected when the roots had already reached 1.7 m depth. The tracer  
174 application rates aimed at ensuring significant enrichment in plants and transpiration water, and were  
175 based on estimated N and water availability in the soil, the natural isotope enrichment, and assumed  
176 uptake rates of applied tracers. In Exp.1 where two N fertilizer levels were established (240/80 kg ha<sup>-1</sup>  
177 <sup>1</sup>), the <sup>15</sup>N application was adjusted similarly and the N240 and N80 treatments received 0.96 g and  
178 0.32 g <sup>15</sup>N, respectively. In Exp. 2, each chamber received 0.5 g <sup>15</sup>N. Tracer solution was prepared  
179 by mixing the specific amount of Ca(<sup>15</sup>NO<sub>3</sub>)<sub>2</sub> (>98.9 at% <sup>15</sup>N) with 50 ml <sup>2</sup>H<sub>2</sub>O (<sup>2</sup>H content = 99.94%)  
180 and 50 ml distilled water for each chamber.

181 The tracer was injected into 20 injection holes at each injection depth, which were evenly distributed  
182 in two parallel rows. The holes were 25 cm deep, made by a steel stick 0.5 cm in diameter. Inside  
183 each of the 20 holes, a 5 ml tracer solution was injected. The syringe needle was pushed 25 cm into  
184 the soil, and 1 ml of the solution was released every five centimeters as the syringe was drawn back.  
185 In this way, the tracer solution was distributed into 100 individual points in the soil at each injection  
186 depth. The injection procedures were conducted between 1:00 – 4:00 pm on April 3, 2019 and April  
187 17, 2020.

#### 188 *Sampling and sample preparation*

189 Transpiration water for <sup>2</sup>H tracing and leaf samples for <sup>15</sup>N tracing was collected five times in each  
190 experiment. The first sampling time was in the morning, right before the injection, and subsequently

191 four times after the injection (Table 2). The collection of transpiration water was initiated between  
192 10:00 and 11:00 on the sampling day. Each plant was covered with a plastic bag that was tightened  
193 by a rubber band at the bottom. After two hours, the condensed droplets of transpired water inside  
194 the bags were collected. The water was quickly transferred from the bags to sealed plastic bottles.  
195 The collected transpiration water was filtered through 2  $\mu\text{m}$  filter paper to remove dirt and debris.  
196 Filtered water from all plants grown in the same chamber was mixed for  $^2\text{H}$  analysis. Three to five of  
197 the latest fully developed leaves were collected on the same days as the transpiration water samplings.  
198 Leaf samples were dried, weighed, milled, and then encapsulated for  $^{15}\text{N}$  analysis. To determine the  
199 effect of water deficit on plant growth, the leaf samples were also analyzed for  $^{13}\text{C}$  in Exp. 2.

200 The total aboveground biomass was collected on June 5, 2019 and June 18, 2020, in Exp. 1 and 2,  
201 respectively. Biomass samples were divided into stems, pods, and leaves. However, in Exp. 2, all  
202 leaves had been shed when the total biomass was collected. Biomass samples from all plants in each  
203 chamber were mixed, dried at  $70^\circ\text{C}$  to constant weight, and weighed and stored until further analysis.  
204 In both experiments, biomass samples were analyzed for  $^{15}\text{N}$ .

205 Soil samples from 0.5, 1.1, and 1.7 m soil depths were taken before tracer injection and after the last  
206 isotope sampling to determine soil nitrate and  $^{15}\text{N}$  concentration. All soil samples were frozen  
207 immediately after sampling and stored until further preparation. Subsequently, 20 g soil was taken  
208 from each sample and mixed with 100 ml 2M KCl solution. The mixture was shaken for one hour  
209 and filtered through 2  $\mu\text{m}$  filter paper. All solution samples were frozen for later analysis.

#### 210 *Isotopic analyses*

211 All isotopic measurements were done by the Stable Isotope Facility, UC Davis.  $^{15}\text{N}$  and  $^{13}\text{C}$  values in  
212 biomass samples were analyzed using IRMS.  $^2\text{H}$  values in transpiration water samples were analyzed  
213 using the Laser Water Isotope Analyzer V2 (Los Gatos Research, Inc., Mountain View, CA, USA).  
214  $^{15}\text{N}$  concentration in soil samples was measured using IRMS. Nitrate-N content in the frozen soil  
215 solution was measured using the flow injection analyzer method.

216  $^2\text{H}$  and  $^{15}\text{N}$  enrichment (‰) was calculated as the increase of  $^2\text{H}$  and  $^{15}\text{N}$  values from pre-tracer  
217 sampling to post-tracer sampling unless otherwise stated. The ratio (%) of 1.7 m - and 0.5 m - derived  
218  $^2\text{H}$  enrichment in transpiration water in the same treatment was calculated to investigate the



219 distribution of water uptake. To compare  $^{15}\text{N}$  uptake between different treatments more directly,  $^{15}\text{N}$   
220 uptake efficiency ( $^{15}\text{N}_{\text{upe}}$ ; %  $\text{g}^{-1}$ ) was calculated as:

$$221 \quad ^{15}\text{N}_{\text{upe}} = \frac{x(^{15}\text{N})_{\text{sample}} - x(^{15}\text{N})_{\text{control}}}{^{15}\text{N}_a} \quad (2)$$

222 where  $x(^{15}\text{N})_{\text{sample}}$  and  $x(^{15}\text{N})_{\text{control}}$  are the atom fraction of  $^{15}\text{N}$  in post-tracer samples and pre-tracer  
223 samples, respectively. In harvest samples,  $x(^{15}\text{N})_{\text{control}}$  refers to the natural abundance of  $^{15}\text{N}$  in plant  
224 organs, which is usually 0.366%.  $^{15}\text{N}_a$  is the total amount (g) of  $^{15}\text{N}$  that was added to the soil.

#### 225 *Soil water measurements*

226 Four time-domain reflectometry sensors (TDR-315/TDR-315L, Acclima Inc., Meridian, Idaho) were  
227 installed in every chamber. They were placed at 0.5, 1.4, 2.3, and 3.5 m depth, respectively, recording  
228 soil volumetric water content (VWC; %) at least every 30 minutes. The VWC sensor readings were  
229 calibrated against VWC in soil samples taken in close proximity to the sensors. The samples were  
230 taken using metal rings with a diameter and a height of 5 cm and VWC was calculated based on the  
231 fresh and dry weight of the samples. For each sensor at least 3 samples were collected at different  
232 times aiming at covering a broad range of water content. Based on the correlations between sensor  
233 VWC and sample VWC, the sensor readings were adjusted to obtain an intercept of zero. The  
234 correlations did not call for a slope adjustment.

235 Two periods around the middle of the isotope sampling period were selected for estimating the water  
236 uptake during the sampling period. In Exp. 1, it was a 20-day period starting from 4 days after  
237 injection and ending four days before the last sampling date. In Exp. 2, a 14-day period was selected,  
238 which began four days after injection and ended four days before the last sampling date. Letting each  
239 sensor represent a 1 m depth-interval the soil water content in each interval was calculated ( $\text{mm m}^{-1}$   
240 soil column). No water was added during the selected periods, thus soil water movement was assumed  
241 negligible and a decrease in soil water content was interpreted as plant water uptake. In both  
242 experiments, the daily water uptake was calculated only for the top 3 m soil columns, where most  
243 roots were found.

#### 244 *Root imaging, segmentation, and calculation*

245 During the experimental periods, the growth of oilseed rape roots was recorded every three to four  
246 weeks with a digital camera (Olympus Tough TG 860). The camera was in a box excluding daylight  
247 but with internal LED light strips as the light source. The box fits the frames of each panel of the

248 rhizobox chambers, and by taking five photos per panel, the total area of each panel was photographed  
249 for subsequent image segmentation. RootPainter (Smith et al. 2020a) was used to segment roots from  
250 the soil background. A model trained with randomly selected images was used to segment roots on  
251 all the images and estimate the root length in each image via skeletonization and pixel counting (Smith  
252 et al. 2020b). Root intensity was calculated as cm of root per cm<sup>2</sup> of soil in the images.

### 253 *Statistics*

254 Data analyses were conducted in R (Version 3.5.3, R Core team 2019). The effect of N and water  
255 treatment on the harvested biomass and N content was tested in t-tests in separate tests for each  
256 experiment and for each plant organ. T-tests were used for comparing root intensity under different  
257 treatments. Separate tests were performed for each experiment and depth. The main effects of N/water  
258 supply and depth on daily water uptake were tested using a linear mixed model. A linear mixed model  
259 was used to examine differences in  $\delta^{13}\text{C}$  in leaf samples under different water treatments in Exp. 2.  
260 Foliar  $\delta^{13}\text{C}$  values from all sampling dates were compared together, where dates and water treatments  
261 were fixed effects and chamber was a random effect. Linear mixed models were used to examine  
262 differences in  $^2\text{H}$  enrichment in water samples and  $^{15}\text{N}_{\text{upe}}$  in biomass samples among N/water  
263 treatments, dates, and injection depths, where the combined factor of N/water level and depth (level-  
264 depth combined treatment, e.g., N80 - 0.5 m) and dates were fixed effects and chamber was a random  
265 effect. Multiple comparisons were conducted subsequently to test for changes in  $^2\text{H}$  enrichment and  
266  $^{15}\text{N}_{\text{upe}}$  within the same level-depth combined treatment among all the dates. In both experiments, the  
267 effect of N/water supply on  $^{15}\text{N}_{\text{upe}}$  in harvest samples within the same organ was tested using linear  
268 mixed models with level-depth combined treatment as a fixed factor and chamber direction as a  
269 random factor. Multiple comparisons were done to compare  $^{15}\text{N}_{\text{upe}}$  in harvest samples within the same  
270 organ.

271 For  $^2\text{H}$  enrichment analysis, data were log-transformed to fulfill assumptions of normality and  
272 homogeneity. Multiple comparisons (Tukey HSD;  $P \leq 0.05$ ) were based on values derived from linear  
273 mixed models.

## 274 **Results**

### 275 *Biomass*

276 Oilseed rape plants grew well in both years. In Exp. 1, the effect of N fertilization rate was evident,  
277 as the N240 treatment resulted in significantly higher leaf, stem, and pod biomass than N80 (Table  
278 3). The N content in all three organs also increased when more N was given.

279 No significant differences were found in biomass or N content between the water treatments in Exp.  
280 2. Plants that grew under lower soil water content tended to have a lower stem and pod biomass, while  
281 the N content in the pod and stem samples at harvest was slightly higher when less water was supplied,  
282 although not significant (Table 3).

### 283 *Root growth*

284 Root growth was recorded from March to June, covering tracer injection and sampling periods in  
285 both years (Fig. 1). Roots were present below 1.7 m already in April in both experiments. In Exp. 1,  
286 roots reached just below 2 m depth during the labelling period (Fig. 1a). In Exp. 2 roots were present  
287 below 3 m in April (Fig. 1b). At the time of labelling, the average root intensities in the top 2 m soil  
288 layers were approximately four times higher in Exp. 2 than in Exp. 1 (0.25 and 0.06 cm cm<sup>-2</sup>,  
289 respectively).

290 In both years and all treatments, root intensity tended to increase below 0.5 m from fertilization in  
291 March to June (Fig. 1c and d). There was a tendency towards more root growth in the N240 than in  
292 the N80 treatment in the lower soil layers. No significant differences in root growth were found  
293 between the two water regimes. In both experiments, the root intensity in the top 0.5 m decreased  
294 from March to June.

### 295 *Water extraction*

296 VWC at the three recorded depths were similar in the two N treatments during the isotope sampling  
297 period in Exp. 1. Only the VWC at 0.5 m depth in the water deficit treatment tended to be lower  
298 during the sampling period in Exp. 2 (Fig. 2a and c).

299 Based on the simplified estimations of daily water uptake, more than 1 mm of water was removed  
300 from the 0-1 m soil layer per day during the selected labelling period, while less than 1 mm was  
301 removed from the 1-2 and 2-3 m soil layers in Exp. 1 (Fig. 2b). It was clear that with higher N  
302 application, water uptake throughout the whole soil profile was increased, though not significant.

303 The total amount of water taken up in the two water regimes in Exp. 2 was similar. In total, 2.80 and  
304 2.97 mm water per day was removed within the selected period from the top 3 m of the soil column  
305 in the WW and WD treatment respectively (Fig. 2d). However, a shift towards water uptake from  
306 deeper soil layers in the WD treatment was observed, as the water deficit in the topsoil increased  
307 water uptake in the 2-3 m interval. However, the trend was not significant. Additionally, slight and

308 insignificant increases in  $\delta^{13}\text{C}$  values were observed in leaves, which further indicated plants under  
309 the WD treatment were not drought-stressed during the labelling period in Exp. 2 (Fig. 3).

#### 310 *$^2\text{H}$ enrichment*

311 At both N treatments, when the tracer was injected at 0.5 m depth instead of 1.7 m, a higher  
312 enrichment of  $^2\text{H}$  in transpiration water was expected (Fig. 4a). Besides, the  $^2\text{H}$  enrichment of the  
313 transpiration water was higher in N240 than in N80 treatments on all dates and both injection depths.  
314 The concentration of  $^2\text{H}$  in transpiration water increased significantly with time when the injection  
315 was conducted at 1.7 m. However, when  $^2\text{H}$  was injected at 0.5 m, no increase in concentration with  
316 time was observed.

317 During the labelling period in Exp. 2, the lowest  $^2\text{H}$  concentration in the transpiration water was found  
318 in the WW treatment when the tracer was injected at 1.7 m. When injected at 0.5 m depth, higher  $^2\text{H}$   
319 concentrations in transpiration water at the WD treatment than at the WW treatment was seen at the  
320 first sampling dates, but in the WD treatment, it fell by c. 60% between April 27 and May 3, while it  
321 did not change much over time in the WW treatment (Fig. 4b).

322 In Exp. 1 the enrichments of  $^2\text{H}$  derived from 1.7 m were 5 – 35% of the  $^2\text{H}$  derived from 0.5 m in  
323 both treatments, showing a larger proportion of  $^2\text{H}$  uptake from 0.5 m than 1.7 m (Table 4). This ratio  
324 of deep and shallow derived  $^2\text{H}$  enrichment was increased 0 – 10 percentage points in the N240 than  
325 the N80 treatment during the sampling period. For Exp. 2, in the WW treatment, the ratio of  $^2\text{H}$   
326 enrichment with tracer injected at 1.7 and 0.5 m was approximately 20% three weeks after injection.  
327 While in the WD treatment, the ratio was over 30% and further increased 30 percentage points at the  
328 last sampling date (Table 4).

#### 329 *N depletion and accumulation*

330 In spring both years, soil nitrate concentrations of the top 1.7 m soil were low (Table 5) and did not  
331 change much between the first and second sampling dates. There was a high variation in  $^{15}\text{N}$   
332 concentration in the soil nitrate at the soil sampling after the isotope sampling period, and no  
333 significant differences were found between nitrate and  $^{15}\text{N}$  under different N treatments at any of the  
334 sampled depths. In Exp. 2, no significant differences were found in nitrate depletion between the WW  
335 and WD treatments (Table 5).

336 Corrected for  $^{15}\text{N}$  already in the soil before tracer injection, additional  $^{15}\text{N}$  tracer resulted in higher  
337  $^{15}\text{N}$  enrichment in the biomass samples (Fig. 5). At the cessation of Exp. 1, plants under the same N

338 treatment, with  $^{15}\text{N}$  tracers injected at either 0.5 or 1.7 m, exhibited similar  $^{15}\text{N}$  uptake efficiency.  $^{15}\text{N}$   
339 use efficiency of oilseed rape plants in the N80 treatment was twice as high as in the N240 treatment.  
340 In general, an extra gram of  $^{15}\text{N}$  led to a 12 -15% increase in biomass  $^{15}\text{N}$  atom fraction in the N80  
341 treatment, while in the N240 treatment, the increase in  $^{15}\text{N}$  atom fraction per gram  $^{15}\text{N}$  added was  
342 only around 6% (Fig. 5a). During the labelling period in Exp. 1, the leaf  $^{15}\text{N}$  uptake efficiency tended  
343 to increase with time (Fig. 5b), which indicated more  $^{15}\text{N}$  was accumulated in the leaves. However,  
344 this was only significant when  $^{15}\text{N}$  was injected at 1.7 m. Independently of  $^{15}\text{N}$  injection depths a  
345 larger fraction of the applied  $^{15}\text{N}$  was found in leaves of oilseed rape plants that had been fertilized  
346 with a lower amount of N.

347  $^{15}\text{N}$  uptake efficiency was almost unaffected by the soil water status or injection depth in the harvest  
348 samples of Exp. 2 (Fig. 5c). While the fraction of  $^{15}\text{N}$  in leaves significantly increased with time, no  
349 clear water treatment or injection depth effect was observed at any measurement date (Fig. 5d).

## 350 **Discussion**

### 351 *Effect of N and water supply on root growth*

352 The difference in root growth along the soil profile between two N treatments was small in the current  
353 study. However, we found a non-significant tendency towards deeper and more roots in the subsoil  
354 after the high rate of N application. The effects of N supply on root growth were found to be  
355 inconsistent in previous studies. Svoboda and Haberle (2006) claimed that a high N fertilization rate  
356 led to reduced wheat rooting depth and density in deeper layers, while Hodge et al. (1999) found the  
357 increased soil N availability to lead to stronger shoot and root growth. The local soil N availability in  
358 subsoil was similar in the high and low N treatments. Thus, the observed enhancement of deeper root  
359 growth under high N supply was most likely a concurrent effect with better shoot growth.

360 According to previous studies, water deficiency has been proven to be the stimulator of deep root  
361 growth and the uptake of deep soil water (Bloom et al. 1985; Vandoorne et al. 2012). Surprisingly,  
362 the effect of water supply on root growth was not seen in this study. In both treatments, the increment  
363 of root intensity along the soil profile except at 1.5 m depth was less than  $0.1 \text{ cm cm}^{-2}$ , indicating  
364 little and non-preferential root growth under short-term water deficit. One possible explanation for  
365 this could be that the water deficiency we observed in the experiment was not severe or long enough  
366 to stimulate the deep root growth previously observed (Skinner 2008; Vandoorne et al. 2012). The

367 other explanation is that plants grew under the water deficit treatment were available to obtain  
368 adequate water from the subsoil. Therefore their growth was not affected by the water deficit.

369 Compared with roots in topsoil, the contribution of deep roots to resource uptake is often ignored, as  
370 they usually develop late and have a limited active period. However, deeper and denser roots in  
371 subsoil do indicate a better capacity for resource acquisition from deep soil layers (Kell 2011; Maeght  
372 et al. 2013). Thus, the factors that directly or indirectly affect deep root growth may also affect deep  
373 resource uptake.

#### 374 *Effect of N and water supply on water uptake*

375 N supply affected the amount, distribution, and dynamics of water uptake. With a higher N  
376 fertilization rate, root water uptake was higher at all depths along the soil profile, with most of the  
377 water taken from the top 1 m layer. Higher <sup>2</sup>H enrichment in transpiration water was found in N240  
378 treatment compared to N80 treatment wherever the tracer was applied. This could be an indicator for  
379 higher uptake of <sup>2</sup>H-labelled water from the labelled depth, or showing that <sup>2</sup>H-labelled water uptake  
380 from the other depths was lower (Rasmussen and Kulmatiski 2021). There is a possibility that the  
381 top-50-cm soil layer, where the soil VWC was not record, dried out during the experimental period,  
382 and topsoil in N240 treatment dried out faster than N80 treatment. In this case, plants fertilized with  
383 N240 took less water from the topsoil, leading to a higher <sup>2</sup>H enrichment in transpiration water.  
384 However, as all plants were expected to be adequately supplied with water in the current experimental  
385 design, the higher <sup>2</sup>H enrichment we found in N240 was mostly due to the higher water uptake from  
386 the labelled depth.

387 With higher N application, the water uptake is promoted by the increased aboveground growth,  
388 transpiration, and photosynthesis (Taylor et al. 1991; Waraich et al. 2011). In addition, high nitrate  
389 supply improves radial water fluxes in roots, as it up-regulates the expression of aquaporin and  
390 enhances root hydraulic conductivity (Gorska et al. 2008; Wang et al. 2016). Still, the improvement  
391 of water uptake was more evident at upper soil layers, where most of the roots were located and  
392 directly affected by the N supply.

393 In the second experiment, as the foliar  $\delta^{13}\text{C}$  values showed, water deficiency in this experiment did  
394 not seem to stress the oilseed rape plants, indicating plants under WD treatment took adequate water  
395 to maintain their growth. The relationships between <sup>13</sup>C isotopic composition/discrimination and  
396 water stress have been widely studied for evaluating the performance of crop under water stress

397 (Farquhar and Richards 1984; Farquhar et al. 1989; Dercon et al. 2006). Plant  $\delta^{13}\text{C}$  was reported to  
398 increase under water-limited conditions (Yousfi et al. 2012). Correspondingly, topsoil water status  
399 did not significantly affect the total amount of water uptake, while we observed altered water uptake  
400 distribution under reduced water supply. More water was taken from deep soil layers in WD treatment  
401 than WW treatment, which implied water deficit stimulated water uptake compensation from deep  
402 soil layers. This corresponds to previous findings by Vandoorne et al. (2012) and Hashemian et al.  
403 (2015), showing that moisture level of different soil layers is a key factor which affect root water  
404 uptake distribution. However, with a similar experimental setup, Rasmussen et al. (2020a) concluded  
405 that chicory failed in compensating water uptake from deeper soil layers. They suggested that the  
406 high hydraulic resistance and drought-induced stomatal closure might reduce root water uptake and  
407 plant water demand, leading to the failure of compensation (Rasmussen et al. 2020b).

408 Except in the WW treatment, the ratio of 1.7 m to 0.5 m derived  $^2\text{H}$ -enrichment increased with time.  
409 The increments were 26, 24, and 31 percentage points in N80, N240, and WD treatment, respectively.  
410 This distribution shift suggests the rising importance of deep roots in water uptake over the three-  
411 week period following injection. The effect of time on deep water uptake may be due to a direct effect  
412 on the development and maturity of roots, which has also been demonstrated by Garrigues et al.  
413 (2006), or to exhaustion of the labelled- $^2\text{H}$  at the 0.5 m depth.

#### 414 *Effect of N and water supply on soil N content and N uptake*

415 Our results showed that increasing N fertilization from 80 to 240 kg N ha<sup>-1</sup> did not significantly  
416 change the content of inorganic N in the top 1.7 m soil, and water deficiency had little effect on the  
417 concentration and distribution of soil nitrate. However, these findings should be interpreted with  
418 caution as there were only a few weeks between the applications of N or water treatments until the  
419 soil measurements. In other studies, such treatments lasted longer, and oilseed rape grown under  
420 higher N fertilization rate or less water supply left more soil nitrate in topsoil layers (Smith et al. 1988;  
421 Dresbøll et al. 2016).

422 N uptake efficiency depends on both root uptake capacity and crop demand. Oilseed rape needs high  
423 N input during the vegetative growing stage (Rathke et al. 2006). Nevertheless, even with a high  
424 capacity to absorb N in autumn and winter, the recovery of fertilized N by oilseed rape is generally  
425 found to be poor (Sieling and Kage 2010), and an increasing rate of N supply can further reduce the  
426 N recovery (Rathke et al. 2006; Bouchet et al. 2016). This reduction in N recovery was also observed  
427 in our study. Despite the fact that the biomass in the N240 treatment was higher than the N80



428 treatment,  $^{15}\text{N}$  recovery in the biomass was higher in the N80 treatment, which indicated more  
429 thoroughly soil N depletion under a lower N fertilization rate. Svoboda and Haberle (2006) pointed  
430 that the effect of high nitrogen supply in the topsoil on reduction of N depletion in the subsoil can be  
431 the result of both less N demand from the subsoil, and reduced root growth in the subsoil. In our case,  
432 the latter was not observed.

433 Effects of water supply on  $^{15}\text{N}$  uptake efficiency were not observed in the current study. This contrasts  
434 with others' findings, which demonstrated that water deficit would reduce N uptake and use efficiency  
435 in various ways (Jensen et al. 1997; Gonzalez-Dugo et al. 2010; Sadras et al. 2016; Riar et al. 2020).  
436 In general, topsoil water deficit reduces the availability of soil N (Jensen et al. 1997) and restricts its  
437 movement via mass flow and diffusion (Plett et al. 2020), hence reducing N uptake from top layers.  
438 To meet crop demand, the N uptake from subsoil would be stimulated. However, it does not seem to  
439 be the case in our study. Two possible explanations may account for the absent observation of  
440 compensated N uptake; one is that the extent of water deficit was not so severe that it affected soil N  
441 availability and subsequent N uptake. The other is that soil dryness directly reduced crop N demand  
442 via reducing the shoot growth; therefore, the efficient N uptake from subsoil is no longer needed. As  
443 no significant reduction in biomass was found in our case, we assume the second explanation was not  
444 the valid reason for the absence of enhanced deep N uptake.

445 The injection depth did not affect  $^{15}\text{N}$  uptake efficiency measured in harvest biomass samples in either  
446 experiment, while the continuous leaf sampling after injection showed different patterns of  $^{15}\text{N}$  uptake  
447 dynamic at 0.5 and 1.7 m. When  $^{15}\text{N}$ -labelled nitrate was applied at 0.5 m, the  $^{15}\text{N}$  uptake efficiency  
448 reached a peak in one to two weeks, while the efficiency kept increasing after injection at 1.7 m,  
449 suggesting some  $^{15}\text{N}$ -labelled nitrate still remained in the soil. Besides, in Exp. 1, one month after the  
450 injection, soil  $^{15}\text{N}$  enrichment at 1.7 m was much higher than at 0.5 m, which further confirmed that  
451 more  $^{15}\text{N}$  had been left at 1.7 m after injection. The continuous and delayed N uptake from subsoil  
452 was also observed in winter wheat by Haberle et al. (2006). They suggested the inadequate N supply  
453 from topsoil might be the stimulator of subsoil N uptake. Still,  $^{15}\text{N}$  uptake was less affected by deep  
454 resource placement than  $^2\text{H}$  uptake during the three-week sampling period. This indicates that while  
455 we see substantial uptake of both water and N by the deep parts of the root system, uptake of the two  
456 resources is not equally limited by the low root density and the short time available for active uptake  
457 (Chen et al. 2021).



458 There is no doubt that supplemental N and water supply also affect biomass production. In general,  
459 oilseed rape plants grown with extra N and water supply have been shown to have a higher yield  
460 (Taylor et al. 1991; Schjoerring et al. 1995; Dresbøll et al. 2016; Riar et al. 2020). In the current study,  
461 higher fertilization rate exhibited positive effects on biomass and plant N content. However, we only  
462 observed slight and non-significant increases of biomass under well-watered condition, together with  
463 a non-significant decrease in plant N content. This showed that the overall growth and development  
464 of oilseed rape plants were not restricted by water deficiency.

#### 465 **Conclusions**

466 Overall, when roots are already well developed in upper soil layers, N and water supply could still  
467 alter the water and N uptake via regulating deep water and N acquisition. The effects of reduced N  
468 and N supply on deep water and N uptake were not always the same. Increased water uptake from  
469 deep soil layers was not always accompanied by increased nitrogen uptake. Further research on the  
470 optimal water and N management strategies and the corresponding response of deep root functioning  
471 will be required to maximize the benefits of deep roots and maintain biomass production.

472

473 **REFERENCE**

- 474 Álvarez S, Navarro A, Nicolás E, Sánchez-Blanco MJ (2011) Transpiration, photosynthetic responses, tissue water  
475 relations and dry mass partitioning in Callistemon plants during drought conditions. *Sci Hortic* (Amsterdam)  
476 129:306–312. <https://doi.org/10.1016/j.scienta.2011.03.031>
- 477 Asare E, Scarisbrick DH (1995) Rate of nitrogen and sulphur fertilizers on yield, yield components and seed quality of  
478 oilseed rape (*Brassica napus* L.). *F Crop Res* 44:41–46. [https://doi.org/10.1016/0378-4290\(95\)00051-7](https://doi.org/10.1016/0378-4290(95)00051-7)
- 479 Bloom AJ, Chapin FS, Mooney HA (1985) Resource limitation in plants - an economic analogy. *Annu Rev Ecol Syst* Vol  
480 16 363–392. <https://doi.org/10.1146/annurev.es.16.110185.002051>
- 481 Bouchet AS, Laperche A, Bissuel-Belaygue C, et al (2016) Nitrogen use efficiency in rapeseed. A review. *Agron Sustain*  
482 *Dev* 36:. <https://doi.org/10.1007/s13593-016-0371-0>
- 483 Chen G, Dresbøll DB, Thorup-Kristensen K (2021) Dual labelling by 2H and 15N revealed differences in uptake potential  
484 by deep roots of chicory. *Rhizosphere* 19:100368. <https://doi.org/10.1016/j.rhisph.2021.100368>
- 485 Dercon G, Clymans E, Diels J, et al (2006) Differential 13C isotopic discrimination in maize at varying water stress and  
486 at low to high nitrogen availability. *Plant Soil* 282:313–326. <https://doi.org/10.1007/s11104-006-0001-8>
- 487 Dresbøll DB, Rasmussen IS, Thorup-Kristensen K (2016) The significance of litter loss and root growth on nitrogen  
488 efficiency in normal and semi-dwarf winter oilseed rape genotypes. *F Crop Res* 186:166–178.  
489 <https://doi.org/10.1016/j.fcr.2015.12.003>
- 490 Farquhar GD, Ehleringer JR, Hubick KT (1989) Carbon Isotope Discrimination and Photosynthesis. *Annu Rev Plant*  
491 *Physiol Plant Mol Biol* 40:503–537. <https://doi.org/10.1146/annurev.pp.40.060189.002443>
- 492 Farquhar GD, Richards RA (1984) Isotopic composition of plant carbon correlates with water-use efficiency of wheat  
493 genotypes. *Aust J Plant Physiol* 11:539–552. <https://doi.org/10.1071/PP9840539>
- 494 Garrigues E, Doussan C, Pierret A (2006) Water uptake by plant roots: I - Formation and propagation of a water  
495 extraction front in mature root systems as evidenced by 2D light transmission imaging. *Plant Soil* 283:83–98.  
496 <https://doi.org/10.1007/s11104-004-7903-0>
- 497 Gonzalez-Dugo V, Durand J-L, Gastal F (2010) Water deficit and nitrogen nutrition of crops. A review. *Agron Sustain*  
498 *Dev* 30:529–544. <https://doi.org/10.1051/agro/2009059>
- 499 Gorska A, Ye Q, Holbrook NM, Zwieniecki MA (2008) Nitrate control of root hydraulic properties in plants: Translating  
500 local information to whole plant response. *Plant Physiol* 148:1159–1167.  
501 <https://doi.org/10.1104/pp.108.122499>
- 502 Haberle J, Svoboda P, Krejčová J (2006) Uptake of mineral nitrogen from subsoil by winter wheat. *Plant, Soil Environ*  
503 52:377–384. <https://doi.org/10.17221/3455-pse>
- 504 Hashemian M, Ryu D, Crow WT, Kustas WP (2015) Improving root-zone soil moisture estimations using dynamic root  
505 growth and crop phenology. *Adv Water Resour* 86:170–183. <https://doi.org/10.1016/j.advwatres.2015.10.001>
- 506 Hodge A, Robinson D, Griffiths BS, Fitter AH (1999) Why plants bother: Root proliferation results in increased nitrogen  
507 capture from an organic patch when two grasses compete. *Plant, Cell Environ* 22:811–820.  
508 <https://doi.org/10.1046/j.1365-3040.1999.00454.x>
- 509 Jensen LS, Christensen L, Mueller T, Nielsen NE (1997) Turnover of residual 15N-labelled fertilizer N in soil following  
510 harvest of oilseed rape (*Brassica napus* L.). *Plant Soil* 190:193–202. <https://doi.org/10.1023/A:1004253611044>
- 511 Kell DB (2011) Breeding crop plants with deep roots: Their role in sustainable carbon, nutrient and water  
512 sequestration. *Ann Bot* 108:407–418. <https://doi.org/10.1093/aob/mcr175>
- 513 Khan S, Anwar S, Kuai J, et al (2017) Optimization of nitrogen rate and planting density for improving yield, nitrogen  
514 use efficiency, and lodging resistance in oilseed rape. *Front Plant Sci* 8:. <https://doi.org/10.3389/fpls.2017.00532>
- 515 Kirkegaard JA, Lilley JM, Berry PM, Rondanini DP (2021) *Canola*. Elsevier Inc.
- 516 Kirkegaard JA, Lilley JM, Howe GN, Graham JM (2007) Impact of subsoil water use on wheat yield. *Aust J Agric Res*

- 517 58:303–315. <https://doi.org/10.1071/AR06285>
- 518 Kuhlmann H, Barraclough PB, Weir AH (1989) Utilization of mineral nitrogen in the subsoil by winter wheat. *Zeitschrift*  
519 *für Pflanzenernährung und Bodenkd* 152:291–295. <https://doi.org/10.1002/jpln.19891520305>
- 520 Li SX, Wang ZH, Malhi SS, et al (2009) Chapter 7 Nutrient and Water Management Effects on Crop Production, and  
521 Nutrient and Water Use Efficiency in Dryland Areas of China. In: Sparks DL (ed) *Advances in Agronomy*. Elsevier  
522 Academic Press Inc, San Diego, pp 223–265
- 523 Li WD, Hou JL, Wang WQ, et al (2011) Effect of water deficit on biomass production and accumulation of secondary  
524 metabolites in roots of *Glycyrrhiza uralensis*. *Russ J Plant Physiol* 58:538–542.  
525 <https://doi.org/10.1134/S1021443711030101>
- 526 Lynch J, Marschner P, Rengel Z (2012) Chapter 13 - Effect of Internal and External Factors on Root Growth and  
527 Development. In: Marschner P (ed) *Marschner's Mineral Nutrition of Higher Plants (Third Edition)*, Third Edit.  
528 Academic Press, San Diego, pp 331–346
- 529 Lynch JP, Wojciechowski T (2015) Opportunities and challenges in the subsoil: Pathways to deeper rooted crops. *J Exp*  
530 *Bot* 66:2199–2210. <https://doi.org/10.1093/jxb/eru508>
- 531 Maeght JL, Rewald B, Pierret A (2013) How to study deep roots-and why it matters. *Front Plant Sci* 4:299.  
532 <https://doi.org/10.3389/fpls.2013.00299>
- 533 Mueller ND, Gerber JS, Johnston M, et al (2012) Closing yield gaps through nutrient and water management. *Nature*  
534 490:254–257. <https://doi.org/10.1038/nature11420>
- 535 Plett DC, Ranathunge K, Melino VJ, et al (2020) The intersection of nitrogen nutrition and water use in plants: new  
536 paths toward improved crop productivity. *J Exp Bot* 71:4452–4468. <https://doi.org/10.1093/jxb/eraa049>
- 537 Quemada M, Gabriel JL (2016) Approaches for increasing nitrogen and water use efficiency simultaneously. *Glob Food*  
538 *Sec* 9:29–35. <https://doi.org/10.1016/j.gfs.2016.05.004>
- 539 Rasmussen CR, Kulmatiski A (2021) Improving Inferences from Hydrological Isotope Techniques. *Trends Plant Sci*  
540 26:206–209. <https://doi.org/10.1016/j.tplants.2020.12.013>
- 541 Rasmussen CR, Thorup-Kristensen K, Dresbøll DB (2020a) The effect of drought and intercropping on chicory nutrient  
542 uptake from below 2 m studied in a multiple tracer setup. *Plant Soil* 446:543–561.  
543 <https://doi.org/10.1007/s11104-019-04348-8>
- 544 Rasmussen CR, Thorup-Kristensen K, Dresbøll DB (2020b) Uptake of subsoil water below 2 m fails to alleviate drought  
545 response in deep-rooted Chicory (*Cichorium intybus* L.). *Plant Soil* 446:275–290.  
546 <https://doi.org/10.1007/s11104-019-04349-7>
- 547 Rasmussen IS, Dresbøll DB, Thorup-Kristensen K (2015) Winter wheat cultivars and nitrogen (N) fertilization-Effects on  
548 root growth, N uptake efficiency and N use efficiency. *Eur J Agron* 68:38–49.  
549 <https://doi.org/10.1016/j.eja.2015.04.003>
- 550 Rathke GW, Behrens T, Diepenbrock W (2006) Integrated nitrogen management strategies to improve seed yield, oil  
551 content and nitrogen efficiency of winter oilseed rape (*Brassica napus* L.): A review. *Agric Ecosyst Environ*  
552 117:80–108. <https://doi.org/10.1016/j.agee.2006.04.006>
- 553 Riar A, Gill G, McDonald GK (2020) Rate of nitrogen rather than timing of application influence yield and NUE of canola  
554 in south australian mediterranean environments. *Agronomy* 10:7–9.  
555 <https://doi.org/10.3390/agronomy10101505>
- 556 Sadras VO, Hayman PT, Rodriguez D, et al (2016) Interactions between water and nitrogen in Australian cropping  
557 systems: Physiological, agronomic, economic, breeding and modelling perspectives. *Crop Pasture Sci* 67:1019–  
558 1053. <https://doi.org/10.1071/CP16027>
- 559 Schjoerring JK, Bock JGH, Gammelvind L, et al (1995) Nitrogen incorporation and remobilization in different shoot  
560 components of field-grown winter oilseed rape (*Brassica napus* L.) as affected by rate of nitrogen application  
561 and irrigation. *Plant Soil* 177:255–264. <https://doi.org/10.1007/BF00010132>
- 562 Sieling K, Kage H (2010) Efficient N management using winter oilseed rape. A review. *Agron Sustain Dev* 30:271–279.

- 563 <https://doi.org/10.1051/agro/2009036>
- 564 Sinclair TR, Rufty TW (2012) Nitrogen and water resources commonly limit crop yield increases, not necessarily plant  
565 genetics. *Glob Food Sec* 1:94–98. <https://doi.org/10.1016/j.gfs.2012.07.001>
- 566 Skinner RH (2008) Yield, root growth, and soil water content in drought-stressed pasture mixtures containing chicory.  
567 *Crop Sci* 48:380–388. <https://doi.org/10.2135/cropsci2007.04.0201>
- 568 Smith AG, Han E, Petersen J, et al (2020a) RootPainter: Deep Learning Segmentation of Biological Images with  
569 Corrective Annotation. *bioRxiv* 2020.04.16.044461. <https://doi.org/10.1101/2020.04.16.044461>
- 570 Smith AG, Petersen J, Selvan R, Rasmussen CR (2020b) Segmentation of roots in soil with U-Net. *Plant Methods* 16:1–  
571 15. <https://doi.org/10.1186/s13007-020-0563-0>
- 572 Smith CJ, Wright GC, Woodroffe MR, et al (1988) The effect of irrigation and nitrogen fertilizer on rapeseed (*Brassica*  
573 *napus*) production in South-Eastern Australia - II. Nitrogen accumulation and oil yield. *Irrig Sci* 9:15–25.  
574 <https://doi.org/10.1007/BF00292140>
- 575 Svoboda P, Haberle J (2006) The effect of nitrogen fertilization on root distribution of winter wheat. *Plant, Soil Environ*  
576 52:308–313. <https://doi.org/10.17221/3446-pse>
- 577 Taylor AJ, Smith CJ, Wilson IB (1991) Effect of irrigation and nitrogen fertilizer on yield, oil content, nitrogen  
578 accumulation and water use of canola (*Brassica napus* L.). *Fertil Res* 29:249–260.  
579 <https://doi.org/10.1007/BF01052393>
- 580 Thorup-Kristensen K, Halberg N, Nicolaisen M, et al (2020a) Digging Deeper for Agricultural Resources, the Value of  
581 Deep Rooting. *Trends Plant Sci* 25:406–417. <https://doi.org/10.1016/j.tplants.2019.12.007>
- 582 Thorup-Kristensen K, Halberg N, Nicolaisen MH, et al (2020b) Exposing Deep Roots: A Rhizobox Laboratory. *Trends*  
583 *Plant Sci* 25:418–419. <https://doi.org/10.1016/j.tplants.2019.12.006>
- 584 Vandoorne B, Beff L, Lutts S, Javaux M (2012) Root Water Uptake Dynamics of *Cichorium intybus* var. *sativum* Under  
585 Water-Limited Conditions. *Vadose Zo J* 11:vzj2012.0005. <https://doi.org/10.2136/vzj2012.0005>
- 586 Wang M, Ding L, Gao L, et al (2016) The interactions of aquaporins and mineral nutrients in higher plants. *Int J Mol Sci*  
587 17:. <https://doi.org/10.3390/ijms17081229>
- 588 Waraich EA, Ahmad R, Yaseen Ashraf M, et al (2011) Improving agricultural water use efficiency by nutrient  
589 management in crop plants. *Acta Agric Scand Sect B Soil Plant Sci* 61:291–304.  
590 <https://doi.org/10.1080/09064710.2010.491954>
- 591 Wasson AP, Richards RA, Chatrath R, et al (2012) Traits and selection strategies to improve root systems and water  
592 uptake in water-limited wheat crops. *J Exp Bot* 63:3485–3498. <https://doi.org/10.1093/jxb/ers111>
- 593 Yousfi S, Serret MD, Márquez AJ, et al (2012) Combined use of  $\delta$  13C,  $\delta$  18O and  $\delta$  15N tracks nitrogen metabolism and  
594 genotypic adaptation of durum wheat to salinity and water deficit. *New Phytol* 194:230–244.  
595 <https://doi.org/10.1111/j.1469-8137.2011.04036.x>
- 596
- 597

598 **Figure captions**

599 **Fig. 1** Root intensity measured on April 11, 2019 (a), 8 days after tracer injection and on April 28,  
600 2020 (b), 11 days after tracer injection. Differences in root intensity from March 21 to June 4, 2019  
601 (c) and from March 28 to June 12, 2020 (d). N240 = 240 kg N ha<sup>-1</sup>, N80 = 80 kg N ha<sup>-1</sup>, WW = well-  
602 watered, WD = water deficit. Error bars denote standard errors. No significant differences were found  
603 at any depths.

604 **Fig. 2** Soil volumetric water content (VWC; %) and water uptake in Exp. 1 (a, b) and Exp. 2 (c, d).  
605 N240 = 240 kg N ha<sup>-1</sup>, N80 = 80 kg N ha<sup>-1</sup>, WW = well-watered, WD = water deficit. Data were  
606 collected from April 2 to May 1, 2019 in Exp. 1 and from April 16 to May 8, 2020 in Exp. 2. Daily  
607 averages of recorded VWC are shown in a and c. The black segments denoted selected periods for  
608 daily water decrease estimations in Exp. 1 (b) and Exp. 2 (d). Daily water uptake from each 1 m  
609 interval of soil column was estimated as averages of daily water decrease from that column from  
610 April 7 to April 27, 2019 in Exp. 1 and from April 21 to May 4, 2020 in Exp. 2. Error bars denote  
611 standard errors, letters indicate significant differences across the treatments in the same experiment  
612 (p<0.05).

613 **Fig. 3** δ<sup>13</sup>C measured in leaf samples collected during the isotope sampling period in Exp. 2 in well-  
614 watered (WW) and water deficit (WD) treatments. Error bars denote standard errors, letters indicate  
615 significant differences across the treatments (p<0.05).

616 **Fig. 4** Time course of <sup>2</sup>H enrichment in transpiration water was shown under N (a) or water (b)  
617 treatments during isotope sampling periods. N240 = 240 kg N ha<sup>-1</sup>, N80 = 80 kg N ha<sup>-1</sup> (a), WW =  
618 well-watered, WD = water deficit (b). <sup>2</sup>H labelled water was injected at either 0.5 or 1.7 m in each  
619 treatment. Error bars denote standard errors (n=3). Mean values are shown here (± SE).

620 **Fig. 5** <sup>15</sup>N uptake efficiency (% g<sup>-1</sup>) that was measured in harvest samples (a, c), and leaf samples (b,  
621 d) which were collected during the labelling periods in Exp. 1 (a, b) where, N240 = 240 kg N ha<sup>-1</sup>,  
622 N80 = 80 kg N ha<sup>-1</sup> and Exp. 2 (c, d) where, WW = well-watered, WD = water deficit. <sup>15</sup>N tracer was  
623 injected at either 0.5 or 1.7 m in each treatment. Mean values of harvest <sup>15</sup>N use efficiency in different  
624 organs under different N (a) or water (b) treatments are shown here (± SE). Error bars denote standard  
625 errors (n=3), and letters indicate significant differences among treatments within the same organ  
626 (p<0.05). Time course of leaf <sup>15</sup>N use efficiency (% g<sup>-1</sup>) under different N (c) and water (d) regimes  
627 was calculated. Error bars denote standard errors (n=3), and letters indicate significant differences

628 among all sampling dates under the same treatment and injection depth ( $p < 0.05$ ). Mean values are  
629 shown here ( $\pm$  SE).

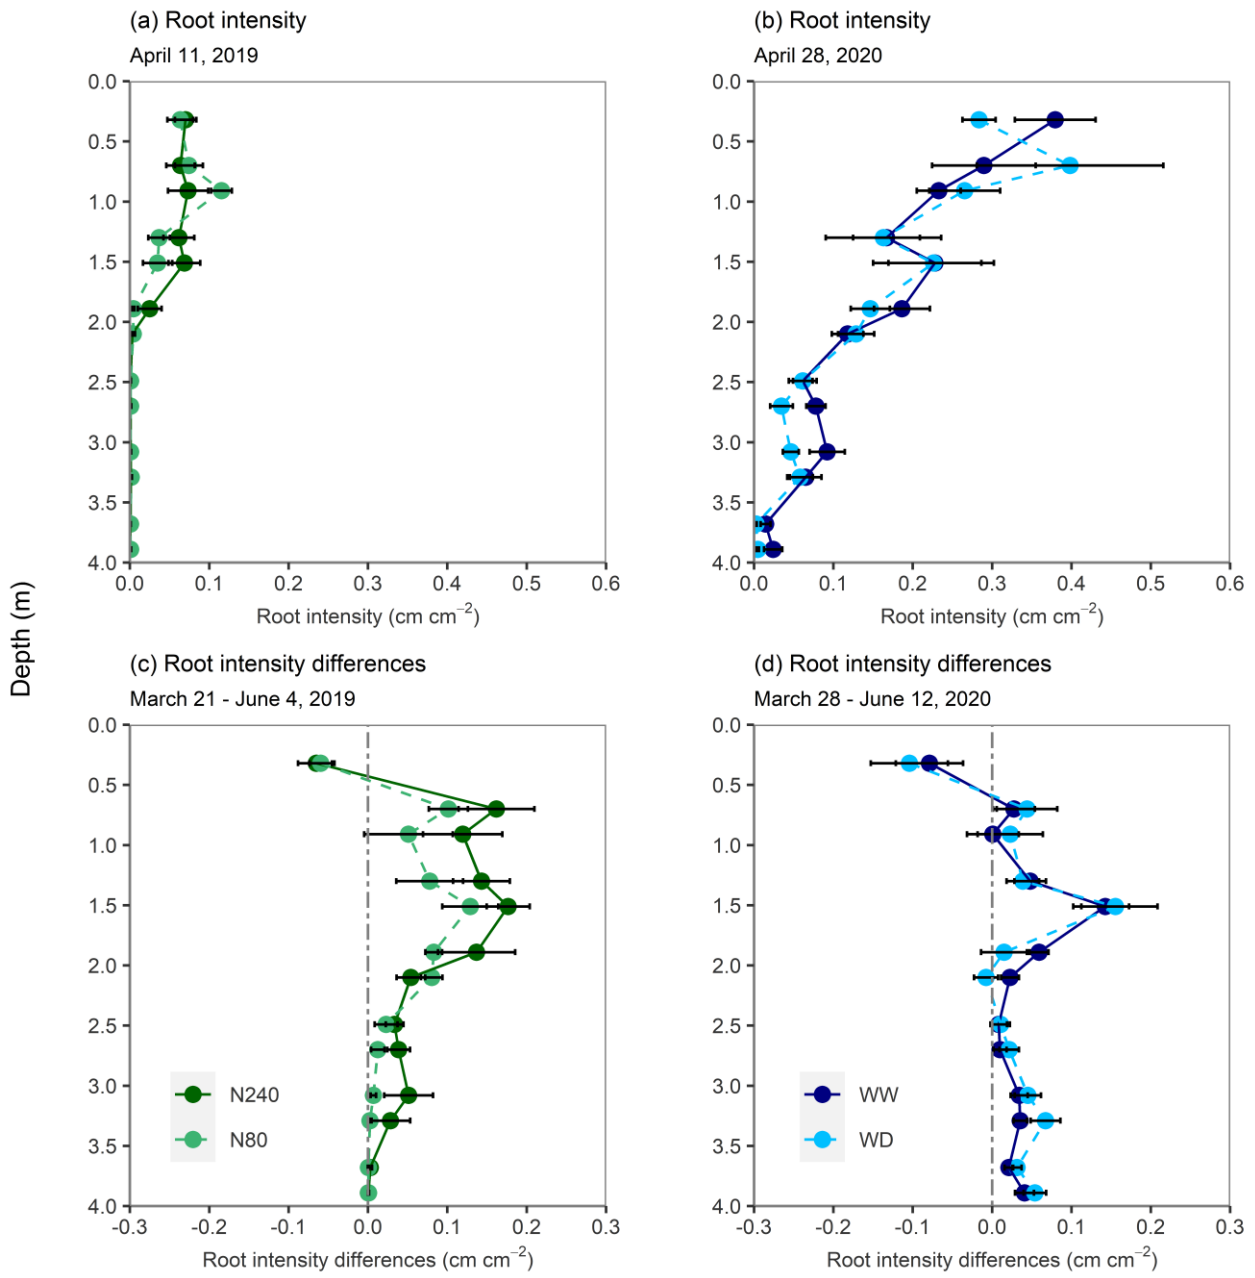

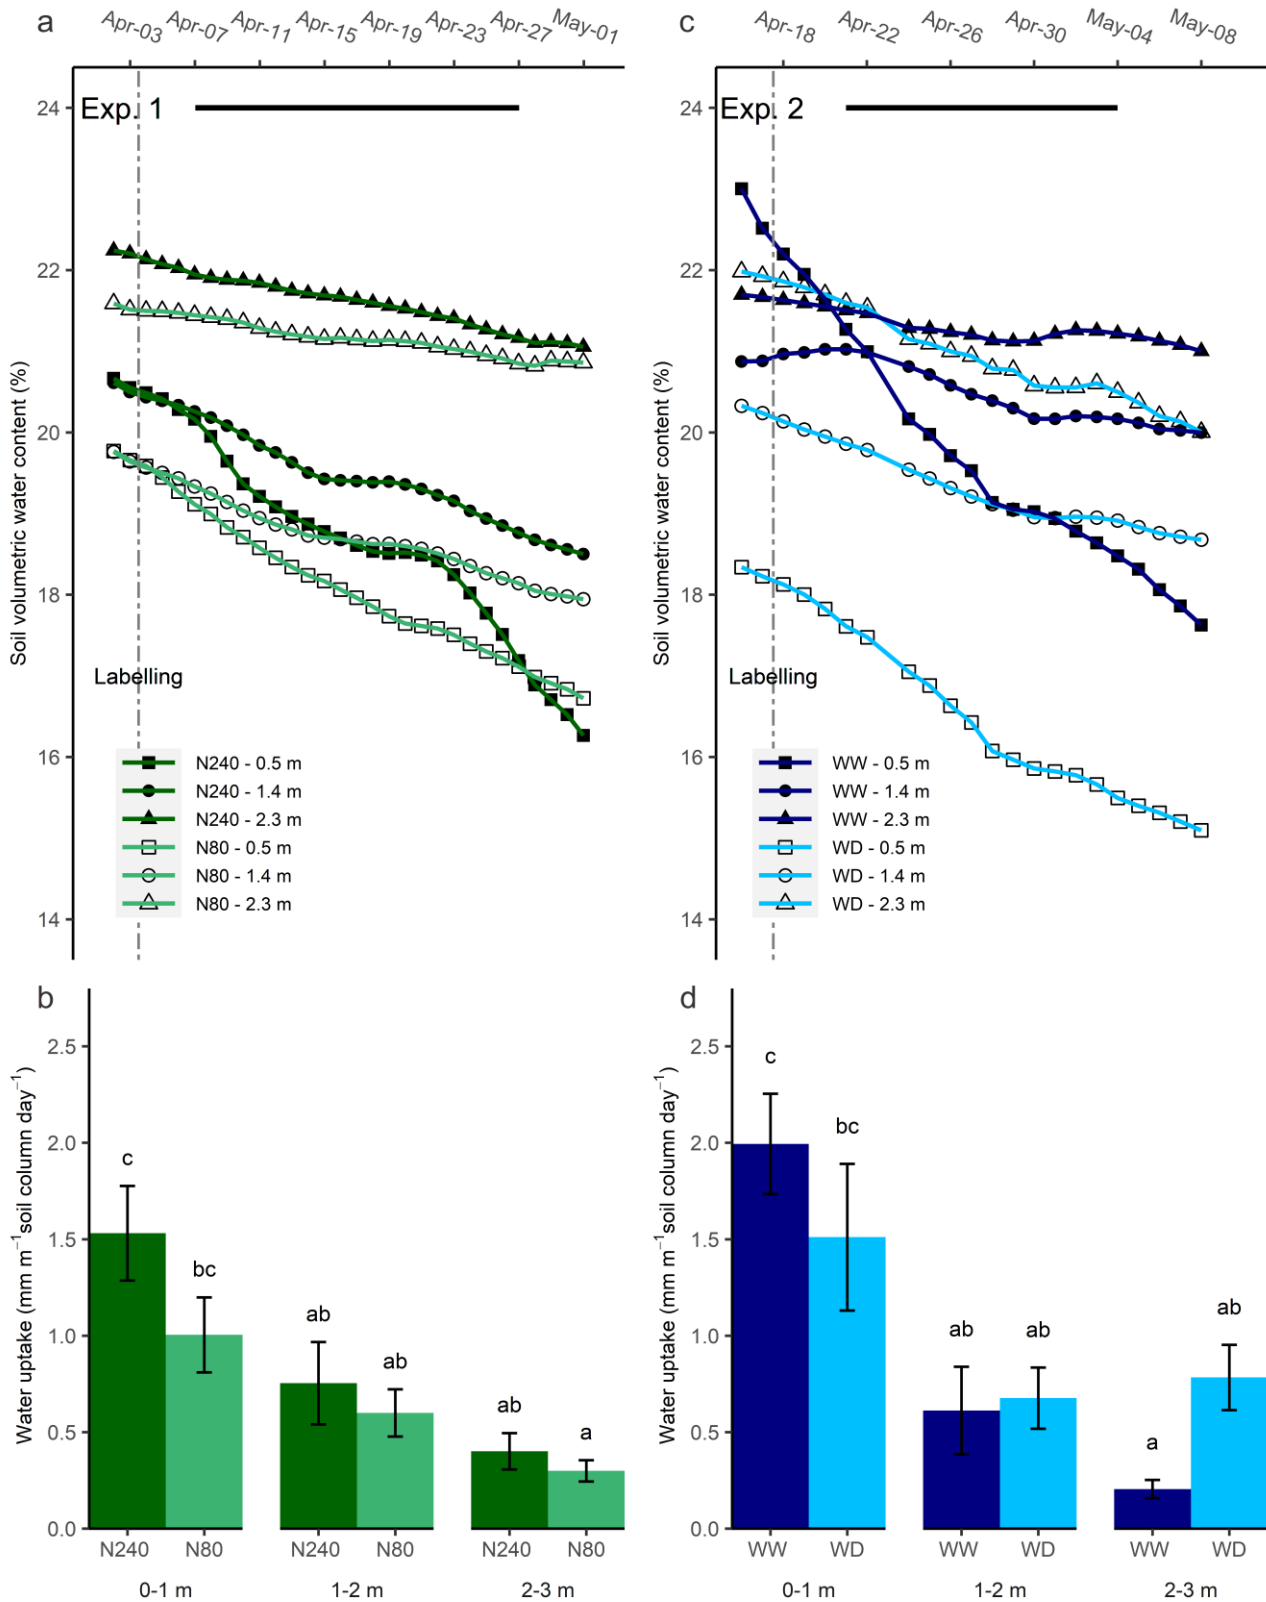



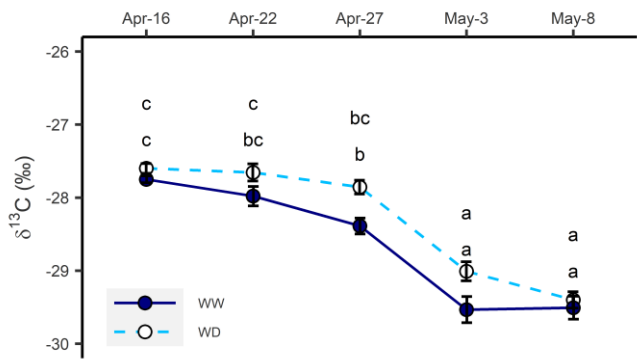

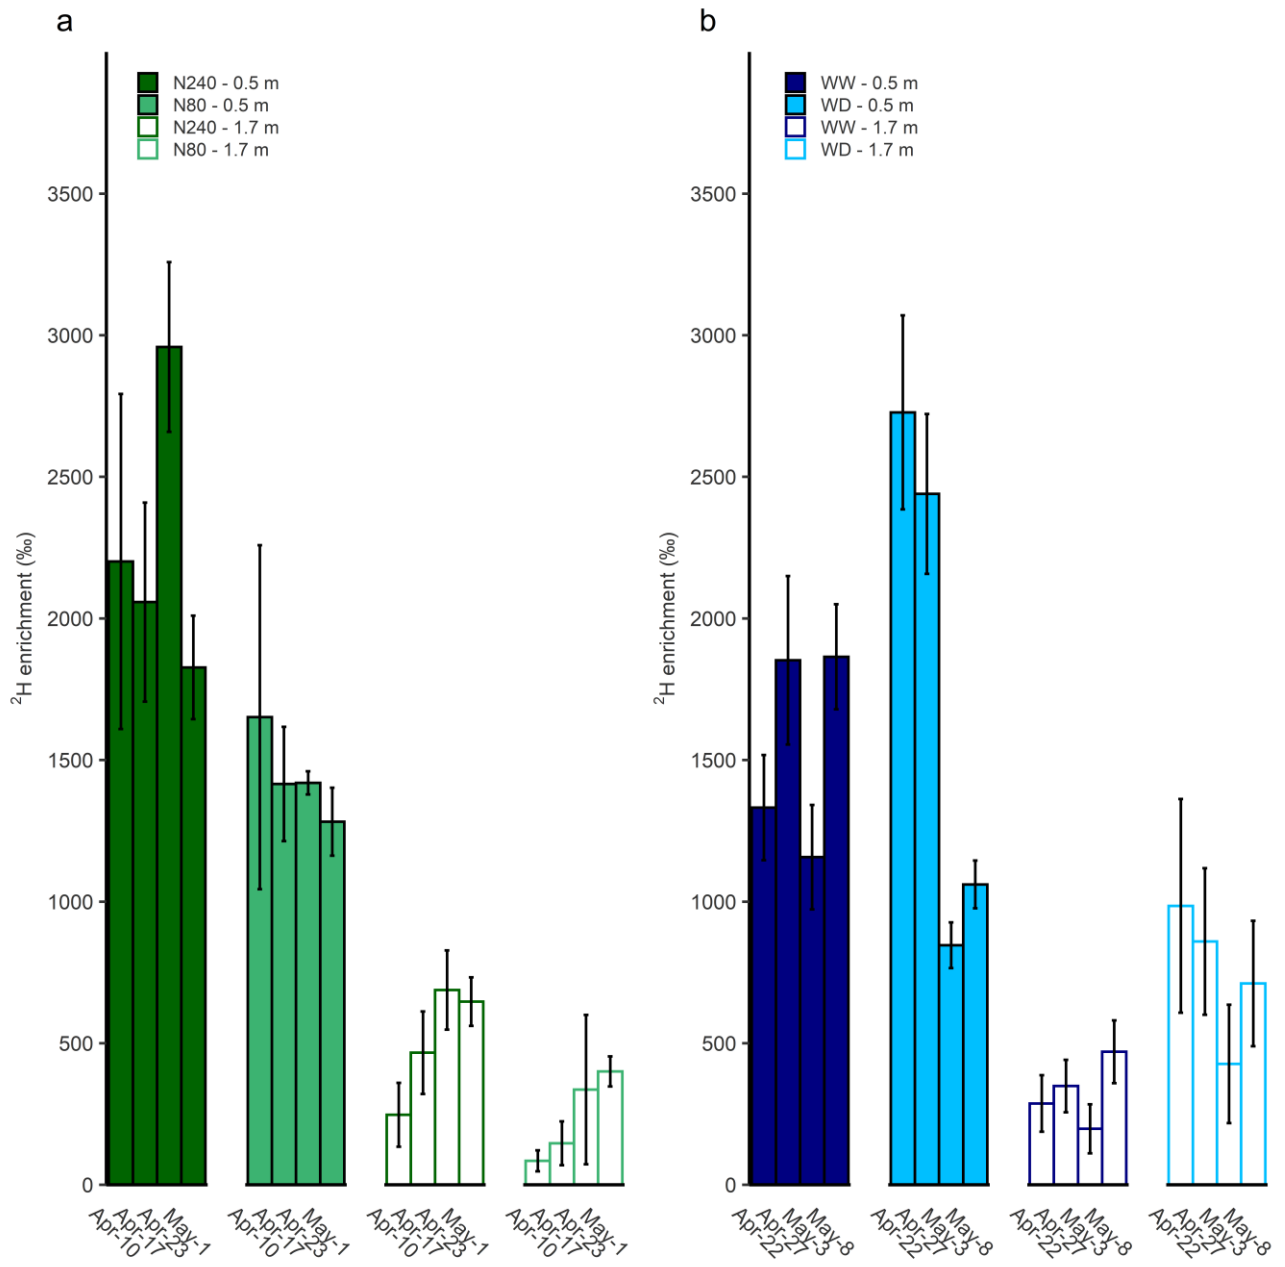

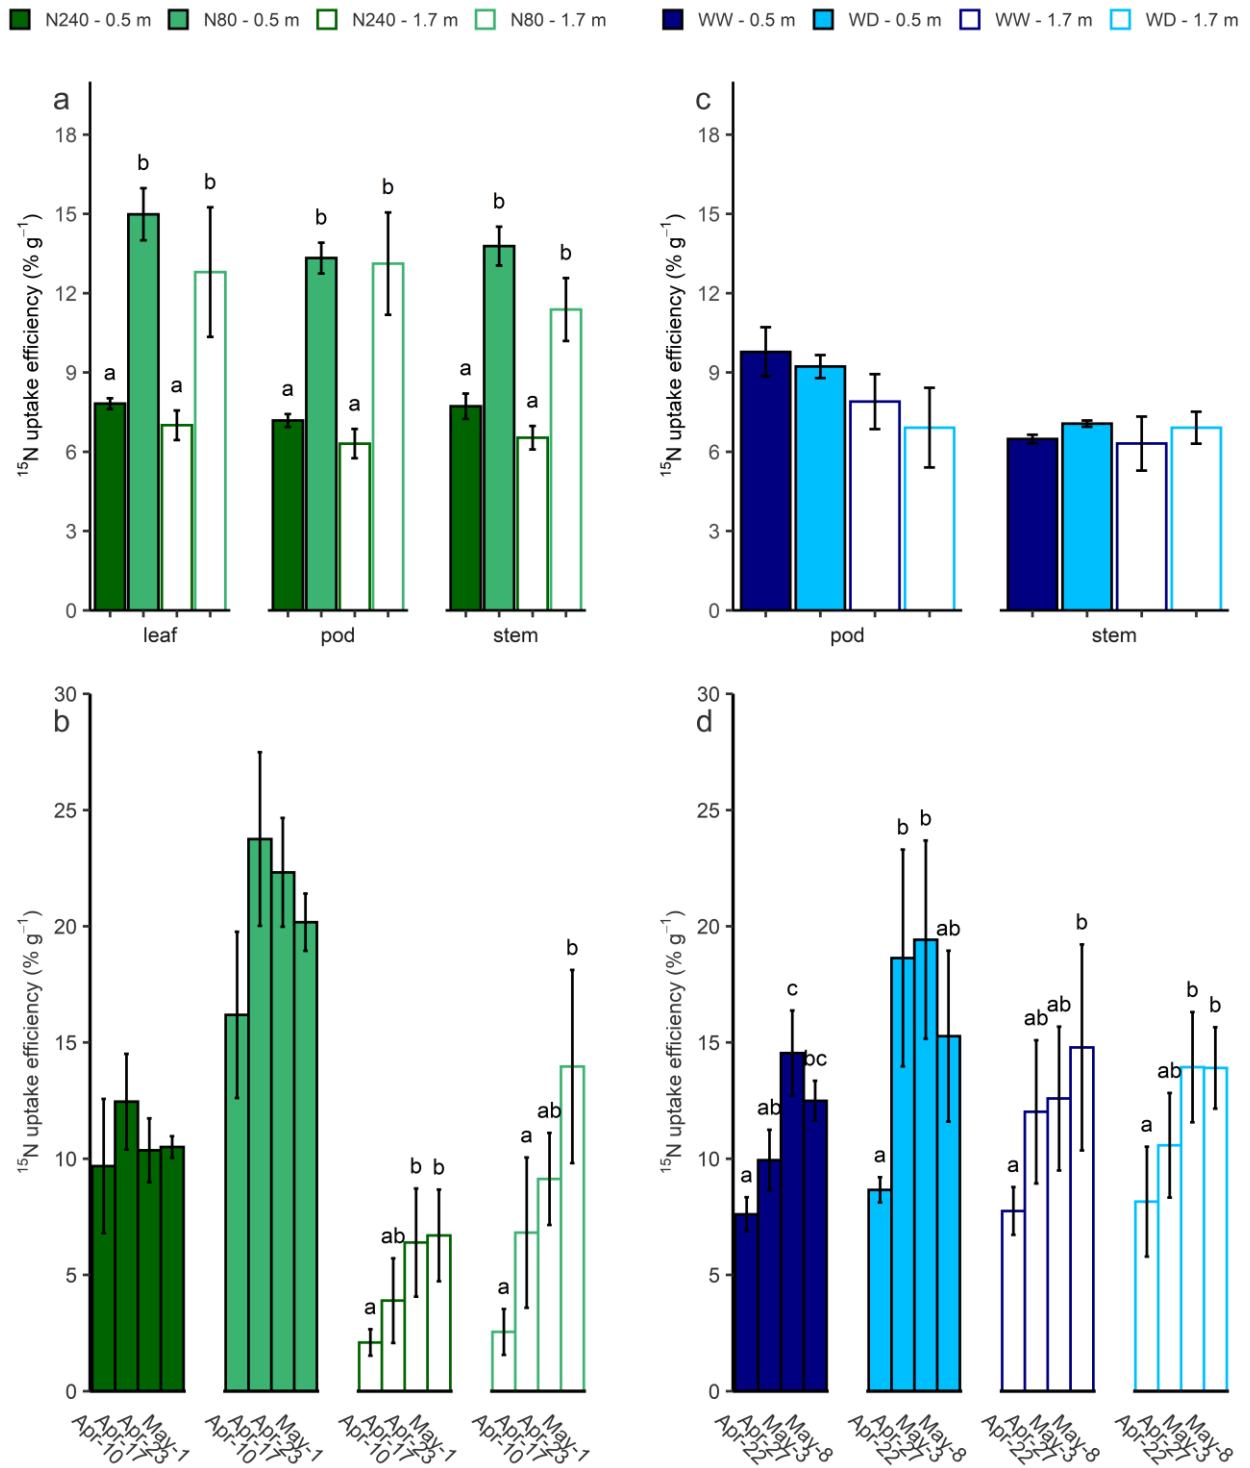

## Tables

**Table 1** Characteristics of the soil in rhizoboxes

| Depth       | Coarse sand (%)<br>0.2–2.0 mm | Fine sand (%)<br>0.02–0.2 mm | Silt (%)<br>0.002–0.02 mm | Clay (%)<br><0.002 mm | Organic matter<br>(%) |
|-------------|-------------------------------|------------------------------|---------------------------|-----------------------|-----------------------|
| 0 - 0.2 m   | 46.4                          | 39.7                         | 5.5                       | 7.0                   | 1.4                   |
| 0.2 – 2.0 m | 26.8                          | 51.1                         | 4.2                       | 17.6                  | 0.3                   |
| 2.0 – 4.0 m | 21.1                          | 54.1                         | 8.7                       | 16.0                  | < 0.1                 |

**Table 2** Treatments and timeline of the experiments. The oilseed rape plants were fertilized with 240 kg N ha<sup>-1</sup> (N240) or 80 kg N ha<sup>-1</sup> (N80) applications in Exp. 1; in Exp. 2 plants were grown under well-watered (WW) or water deficient (WD) conditions at the beginning of the labelling.

|                                    | Exp. 1<br>2018/2019                                                                                                                            | Exp. 2<br>2019/2020                                                                                                                          |
|------------------------------------|------------------------------------------------------------------------------------------------------------------------------------------------|----------------------------------------------------------------------------------------------------------------------------------------------|
| Sowing                             | 16 August 2018                                                                                                                                 | 13 August 2019                                                                                                                               |
| Transplanting                      | 8 October 2018                                                                                                                                 | 26 August 2019 <sup>a</sup>                                                                                                                  |
| Rate of N application              | N240: 240 kg N ha <sup>-1</sup><br>N80: 80 kg N ha <sup>-1</sup>                                                                               | 200 kg N ha <sup>-1</sup>                                                                                                                    |
| Date of N application              | 27 March                                                                                                                                       | 1 <sup>st</sup> : 5 September 2019<br>2 <sup>nd</sup> : 2 March<br>3 <sup>rd</sup> : 1 April                                                 |
| Water status                       | WW: Well-watered                                                                                                                               | WW: Well-watered<br>WD: Water deficit                                                                                                        |
| Key irrigation events <sup>b</sup> | None                                                                                                                                           | WW 1 <sup>st</sup> : 14 April, 20 mm<br>WW 2 <sup>nd</sup> : 15 April, 40 mm<br>WD: None                                                     |
| Tracer injection                   | 3 April                                                                                                                                        | 17 April                                                                                                                                     |
| Isotope sampling                   | 1 <sup>st</sup> : 2 April<br>2 <sup>nd</sup> : 10 April<br>3 <sup>rd</sup> : 17 April<br>4 <sup>th</sup> : 23 April<br>5 <sup>th</sup> : 1 May | 1 <sup>st</sup> : 16 April<br>2 <sup>nd</sup> : 22 April<br>3 <sup>rd</sup> : 27 April<br>4 <sup>th</sup> : 3 May<br>5 <sup>th</sup> : 8 May |
| Final biomass collection           | 5 June                                                                                                                                         | 18 June                                                                                                                                      |

<sup>a</sup> Pest infestation (*Delia radicum*) occurred in some of the chambers in September 2019. Thus, a few plants were replaced on September 24, 2019. Replaced plants were sown together with the original ones, but appeared smaller than the original ones throughout the experiment. <sup>b</sup> Irrigation events which might change the soil water status before tracer injection were counted.

**Table 3** Mean plant dry matter and N contents for different N or water treatments at final collection (n = 6). In Exp. 1 the oilseed rape plants were grown under 240 kg N ha<sup>-1</sup> (N240) or 80 kg N ha<sup>-1</sup> (N80) applications and were all well-watered (WW); in Exp. 2 all plants were fertilized with 200 kg N ha<sup>-1</sup>, and grew under well-watered or water deficit (WD) conditions. In the same column, different letters indicate significant differences between treatments in Exp. 1 (*p* < 0.05). No significant differences were found between water treatments in Exp. 2. Pods were not fully ripe in either experiments. \*There were no leaves left when oilseed rape plants were harvested in 2020.

| Experiment | N level | Water status | Plant biomass (g chamber <sup>-1</sup> ) |        |        | N content (mg g <sup>-1</sup> ) |      |       |
|------------|---------|--------------|------------------------------------------|--------|--------|---------------------------------|------|-------|
|            |         |              | Leaf                                     | Stem   | Pod    | Leaf                            | Stem | Pod   |
| Exp. 1     | N240    | WW           | 56.2a                                    | 299.7a | 281.5a | 18.3a                           | 7.1a | 17.4a |
|            | N80     | WW           | 31.9b                                    | 215.7b | 179.4b | 17.1b                           | 5.7b | 16.3b |
| Exp. 2     | N200    | WW           | *                                        | 357.7a | 445.5a | *                               | 3.7a | 11.1a |
|            | N200    | WD           | *                                        | 326.5a | 410.9a | *                               | 3.9a | 11.8a |

**Table 4** The ratio of  $^2\text{H}$  – enrichment in transpiration water with tracer injected at 1.7 m (Enrich<sub>1.7</sub>) and 0.5 m (Enrich<sub>0.5</sub>). The oilseed rape plants were grown under 240 kg N ha<sup>-1</sup> (N240) or 80 kg N ha<sup>-1</sup> (N80) applications and were all well-watered (WW) in Exp. 1; in Exp. 2 all plants were fertilized with 200 kg N ha<sup>-1</sup> fertilizer, and grew under well-watered or water deficit (WD) conditions.

| Experiment | Year | N level | Water status | Sampling date | Enrich <sub>1.7</sub> / Enrich <sub>0.5</sub> (%) |
|------------|------|---------|--------------|---------------|---------------------------------------------------|
| Exp. 1     | 2019 | N240    | WW           | 10 April      | 11                                                |
|            |      |         |              | 17 April      | 23                                                |
|            |      |         |              | 23 April      | 23                                                |
|            |      |         |              | 1 May         | 35                                                |
|            |      | N80     | WW           | 10 April      | 5                                                 |
|            |      |         |              | 17 April      | 10                                                |
|            |      |         |              | 23 April      | 24                                                |
|            |      |         |              | 1 May         | 31                                                |
| Exp. 2     | 2020 | N200    | WW           | 22 April      | 22                                                |
|            |      |         |              | 27 April      | 19                                                |
|            |      |         |              | 3 May         | 17                                                |
|            |      |         |              | 8 May         | 25                                                |
|            |      | N200    | WD           | 22 April      | 36                                                |
|            |      |         |              | 27 April      | 35                                                |
|            |      |         |              | 3 May         | 50                                                |
|            |      |         |              | 8 May         | 67                                                |

**Table 5** Means of soil nitrate content and <sup>15</sup>N concentration in different soil layers before and at the end of labelling periods (in 0.5 and 1.7 m, n=3; in 1.1 m, n=6). The oilseed rape plants were grown under 240 kg N ha<sup>-1</sup> (N240) or 80 kg N ha<sup>-1</sup> (N80) applications and were all well-watered (WW) in Exp. 1; in Exp. 2 all plants were fertilized with 200 kg N ha<sup>-1</sup> fertilizer and grew under well-watered or water deficient (WD) conditions. In Exp. 1, soil samples were taken on April 3 and May 3, 2019; in Exp. 2, soil samples were taken on April 17 and May 9, 2020. For soil nitrate content analysis, soil samples, which were taken from labelled depths, were excluded to avoid the effects of tracer application. For soil <sup>15</sup>N concentration analysis, soil samples of 0.5 and 1.7 m were taken from labelled depths, soil samples of 1.1 m were taken from all depths.

| Experiment | N level | Water status | Depth (m) | Soil NO <sub>3</sub> <sup>-</sup> before (mg N kg <sup>-1</sup> dry weight) | Soil NO <sub>3</sub> <sup>-</sup> after (mg N Kg <sup>-1</sup> dry weight) | Soil <sup>15</sup> N before (‰) | Soil <sup>15</sup> N after (‰) |
|------------|---------|--------------|-----------|-----------------------------------------------------------------------------|----------------------------------------------------------------------------|---------------------------------|--------------------------------|
| Exp. 1     | N240    | WW           | 0.5       | 2.6                                                                         | 2.0                                                                        | 102                             | 1116                           |
|            |         |              | 1.1       | 2.4                                                                         | 2.2                                                                        | 19                              | 33                             |
|            |         |              | 1.7       | 2.9                                                                         | 2.2                                                                        | 163                             | 8669                           |
|            | N80     | WW           | 0.5       | 2.4                                                                         | 1.7                                                                        | 364                             | 1323                           |
|            |         |              | 1.1       | 1.8                                                                         | 2.4                                                                        | 31                              | 38                             |
|            |         |              | 1.7       | 2.9                                                                         | 2.9                                                                        | 70                              | 5109                           |
| Exp. 2     | N200    | WW           | 0.5       | 0.1                                                                         | 0.1                                                                        | *                               | *                              |
|            |         |              | 1.1       | 0.1                                                                         | 0.2                                                                        | *                               | *                              |
|            |         |              | 1.7       | 0.1                                                                         | 0.2                                                                        | *                               | *                              |
|            | N200    | WD           | 0.5       | 0.1                                                                         | 0.1                                                                        | *                               | *                              |
|            |         |              | 1.1       | 0.1                                                                         | 0.1                                                                        | *                               | *                              |
|            |         |              | 1.7       | 0.1                                                                         | 0.1                                                                        | *                               | *                              |

\* Soil <sup>15</sup>N concentration was too low to detect.
